# Supplementary material for: Differentially expressed genes in mycorrhized and nodulated roots of common bean are associated with defense, cell wall architecture, N metabolism, and P metabolism
Source: PubMed Central journal article supplement (PMC5542541; doi:10.1371/journal.pone.0182328), 2017-08-03
Supplement: pone.0182328.s001.pdf [file pone.0182328.s001.pdf]

## S1 Fig

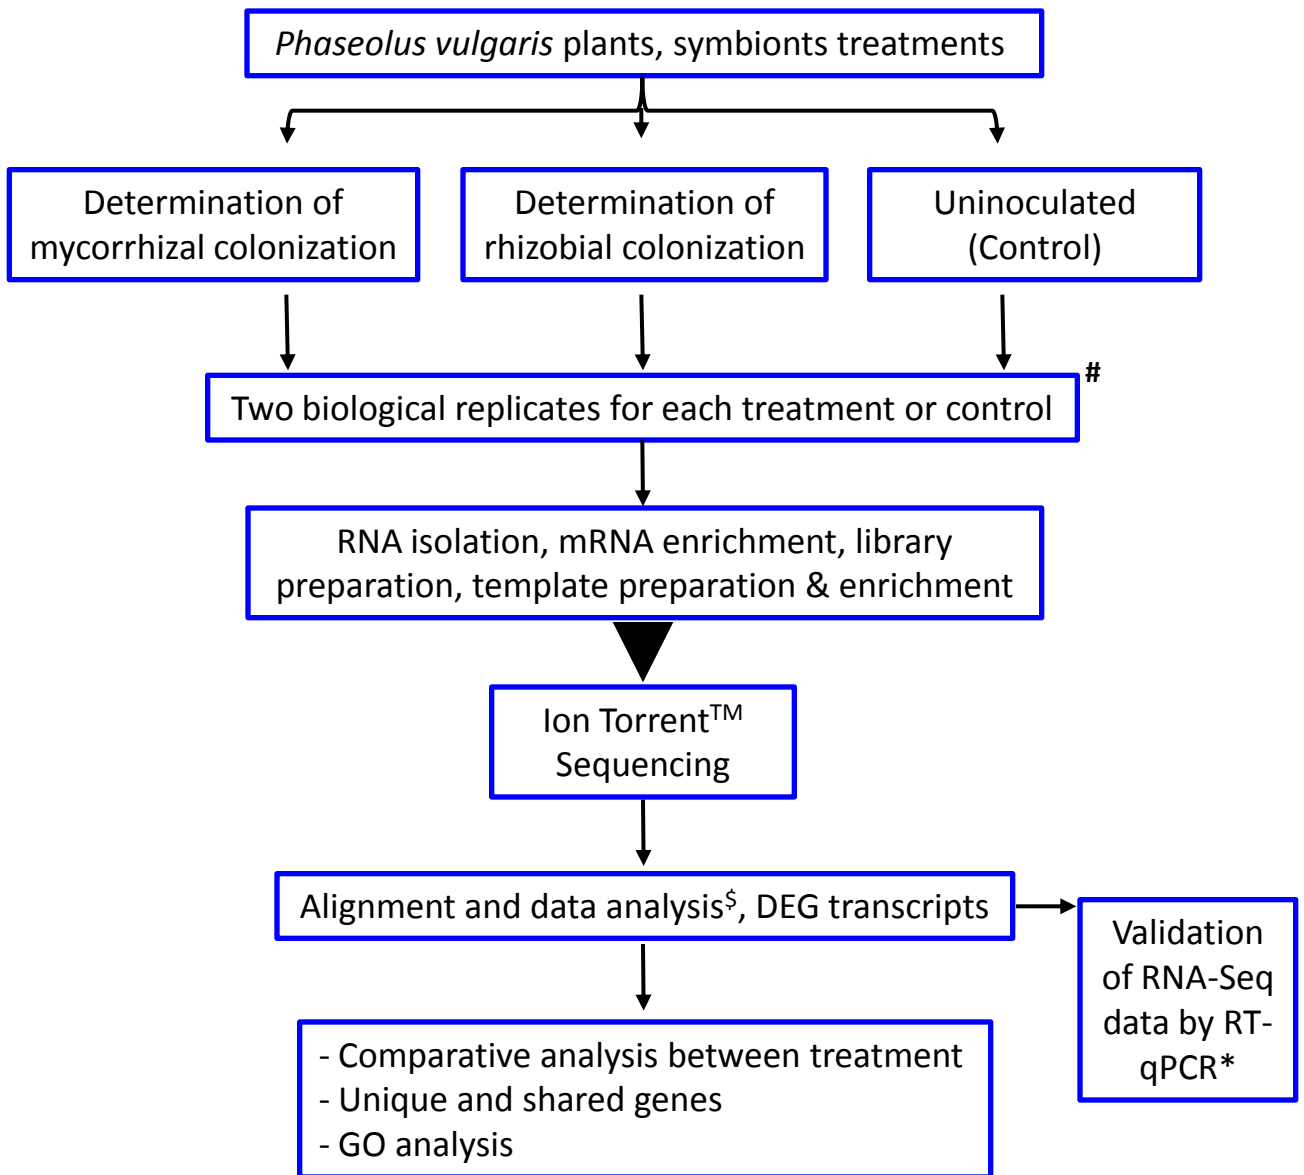

**S1 Fig. Overview of experimental design for RNA-sequencing and data analysis.** Five-day-old wild-type *P. vulgaris* plants were inoculated with *Rhizophagus irregularis* for mycorrhizal colonization or *Rhizobium tropici* for the establishment of root nodules. At 2 weeks post inoculation (wpi), the symbiont-colonized roots were subjected to global RNA sequencing analysis. # Each biological replicate was a pool of 3 symbiont-colonized or control roots. \$ Data analysis includes normalization and quantification (fold-change in expression over control), and values were averaged for two replicates; \* validation of RNA-Seq data by RT-qPCR from three biological replicates.
