# Supplementary material for: Differentially expressed genes in mycorrhized and nodulated roots of common bean are associated with defense, cell wall architecture, N metabolism, and P metabolism
Source: PubMed Central journal article supplement (PMC5542541; doi:10.1371/journal.pone.0182328), 2017-08-03
Supplement: pone.0182328.s003.pdf [file pone.0182328.s003.pdf]

# S3 Fig

## Mycorrhized

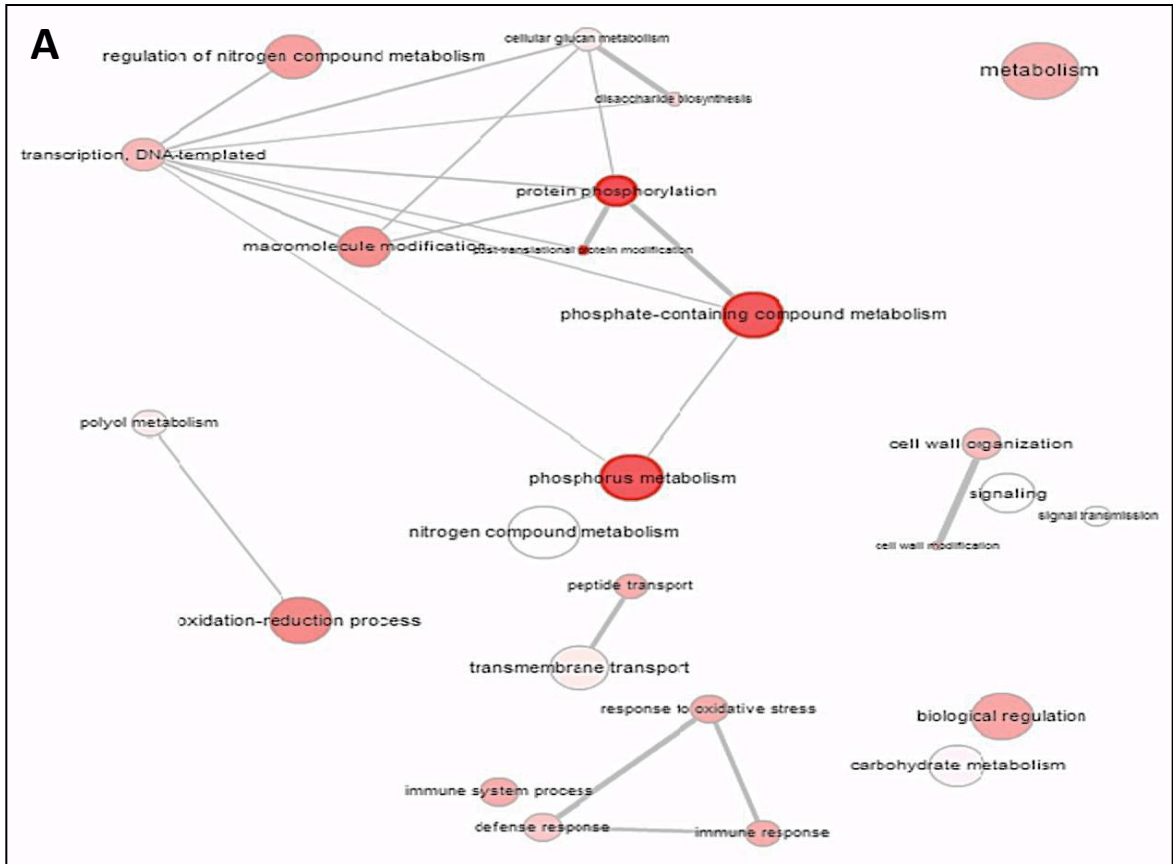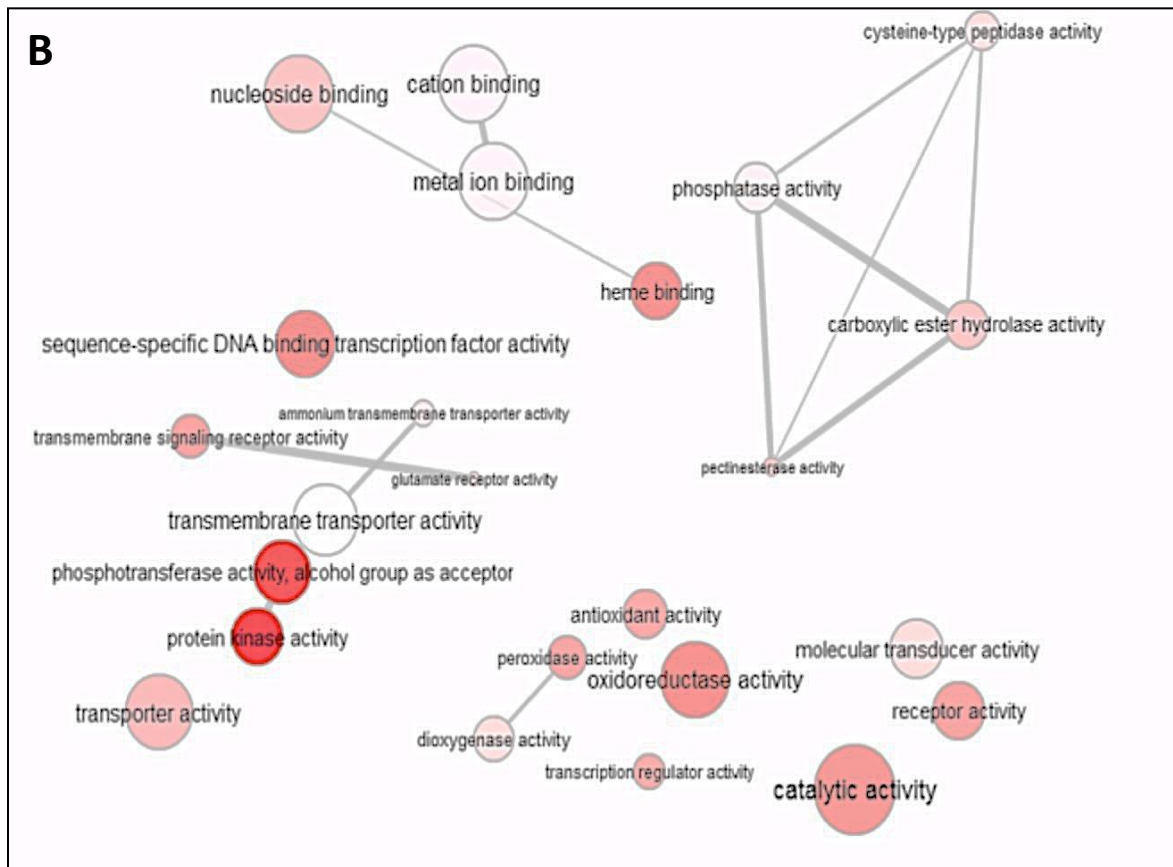



**S3 Fig. Interactive graph of biological processes and molecular function GO terms, as determined by AgriGO and REVIGO algorithms.** GO terms are represented by bubbles and are plotted according to semantic similarities to other GO terms (bubbles linked by edges are most closely related). Bubble size indicates the frequency of the GO term; color indicates semantic similarity. In mycorrhized roots, GO category (A) biological process and (B) molecular function. In nodulated roots, GO category (C) biological process and (D) molecular function.
