# Supplementary material for: Differentially expressed genes in mycorrhized and nodulated roots of common bean are associated with defense, cell wall architecture, N metabolism, and P metabolism
Source: PubMed Central journal article supplement (PMC5542541; doi:10.1371/journal.pone.0182328), 2017-08-03
Supplement: pone.0182328.s004.pdf [file pone.0182328.s004.pdf]

S4 Fig

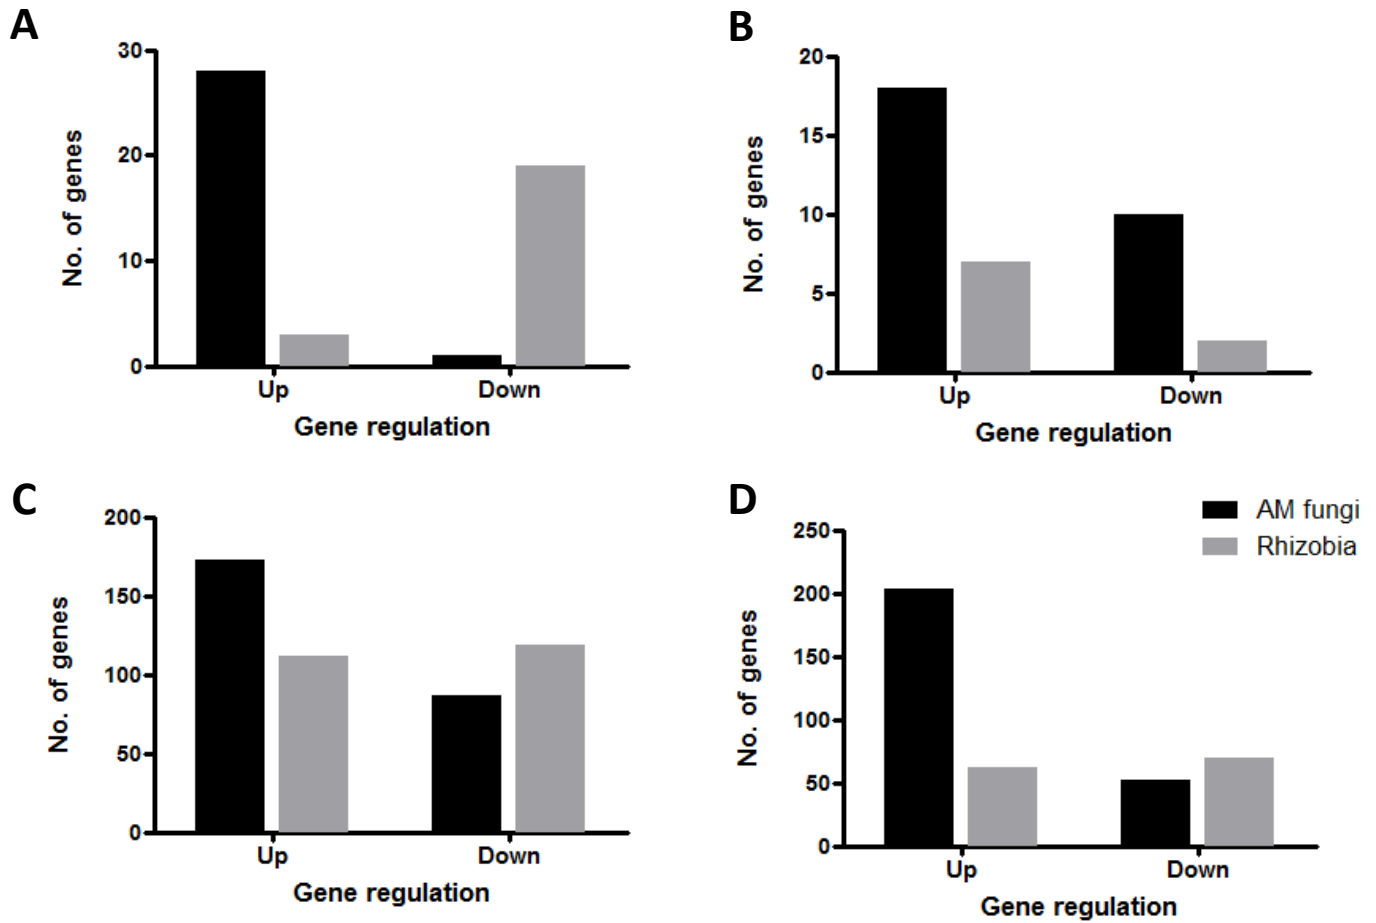

**S4 Fig. Graphical representation of the number of unique upregulated and downregulated genes that responded during mycorrhizal and rhizobial colonization. (A) Defense-responsive, (B) cell wall-related, (C) nitrogen metabolism, and (D) phosphate metabolism genes.**
