# Supplementary material for: Differentially expressed genes in mycorrhized and nodulated roots of common bean are associated with defense, cell wall architecture, N metabolism, and P metabolism
Source: PubMed Central journal article supplement (PMC5542541; doi:10.1371/journal.pone.0182328), 2017-08-03
Supplement: pone.0182328.s005.pdf [file pone.0182328.s005.pdf]

## S5 Fig

A

| Transcript ID    | Gene                                                                 |
|------------------|----------------------------------------------------------------------|
| Phvul.004G139700 | Disease resistance protein (TIR-NBS-LRR class) family                |
| Phvul.010G132200 | Disease resistance protein (TIR-NBS-LRR class) family                |
| Phvul.005G084100 | Toll-Interleukin-Resistance (TIR) domain family protein              |
| Phvul.010G027300 | Disease resistance protein (TIR-NBS-LRR class) family                |
| Phvul.004G140800 | TIR-NBS-LRR class, putative transmembrane receptors; ATP binding     |
| Phvul.004G140100 | Disease resistance protein (TIR-NBS-LRR class), putative             |
| Phvul.010G132000 | Disease resistance protein (TIR-NBS-LRR class) family                |
| Phvul.004G139800 | TIR-NBS-LRR class, putative transmembrane receptors;ATP binding      |
| Phvul.008G220600 | Polyketide cyclase/dehydrase and lipid transport superfamily protein |
| Phvul.004G140700 | Disease resistance protein (TIR-NBS-LRR class), putative             |
| Phvul.010G054400 | Disease resistance protein (TIR-NBS-LRR class) family                |
| Phvul.003G109200 | MLP-like protein 423                                                 |
| Phvul.010G101200 | Disease resistance protein (TIR-NBS-LRR class), putative             |
| Phvul.004G046400 | Disease resistance protein (TIR-NBS-LRR class), putative             |
| Phvul.010G136700 | Disease resistance protein (TIR-NBS-LRR class), putative             |
| Phvul.011G195800 | Disease resistance protein (TIR-NBS-LRR class), putative             |
| Phvul.010G025200 | Disease resistance protein (TIR-NBS-LRR class) family                |
| Phvul.001G093900 | Disease resistance protein (TIR-NBS-LRR class), putative             |
| Phvul.003G070900 | Transmembrane receptors; ATP binding                                 |
| Phvul.011G181400 | Disease resistance protein (TIR-NBS-LRR class), putative             |
| Phvul.010G065400 | PYR1-like 4                                                          |
| Phvul.003G109000 | MLP-like protein 423                                                 |
| Phvul.008G265900 | Disease resistance protein (TIR-NBS-LRR class), putative             |
| Phvul.010G026900 | Disease resistance protein (TIR-NBS-LRR class) family                |
| Phvul.008G195100 | Disease resistance protein (TIR-NBS-LRR class), putative             |
| Phvul.008G267700 | Disease resistance protein (TIR-NBS-LRR class), putative             |
| Phvul.010G026600 | Disease resistance protein (TIR-NBS-LRR class) family                |
| Phvul.011G140400 | Disease resistance protein (TIR-NBS-LRR class), putative             |
| Phvul.009G077200 | PYR1-like 2                                                          |

**B**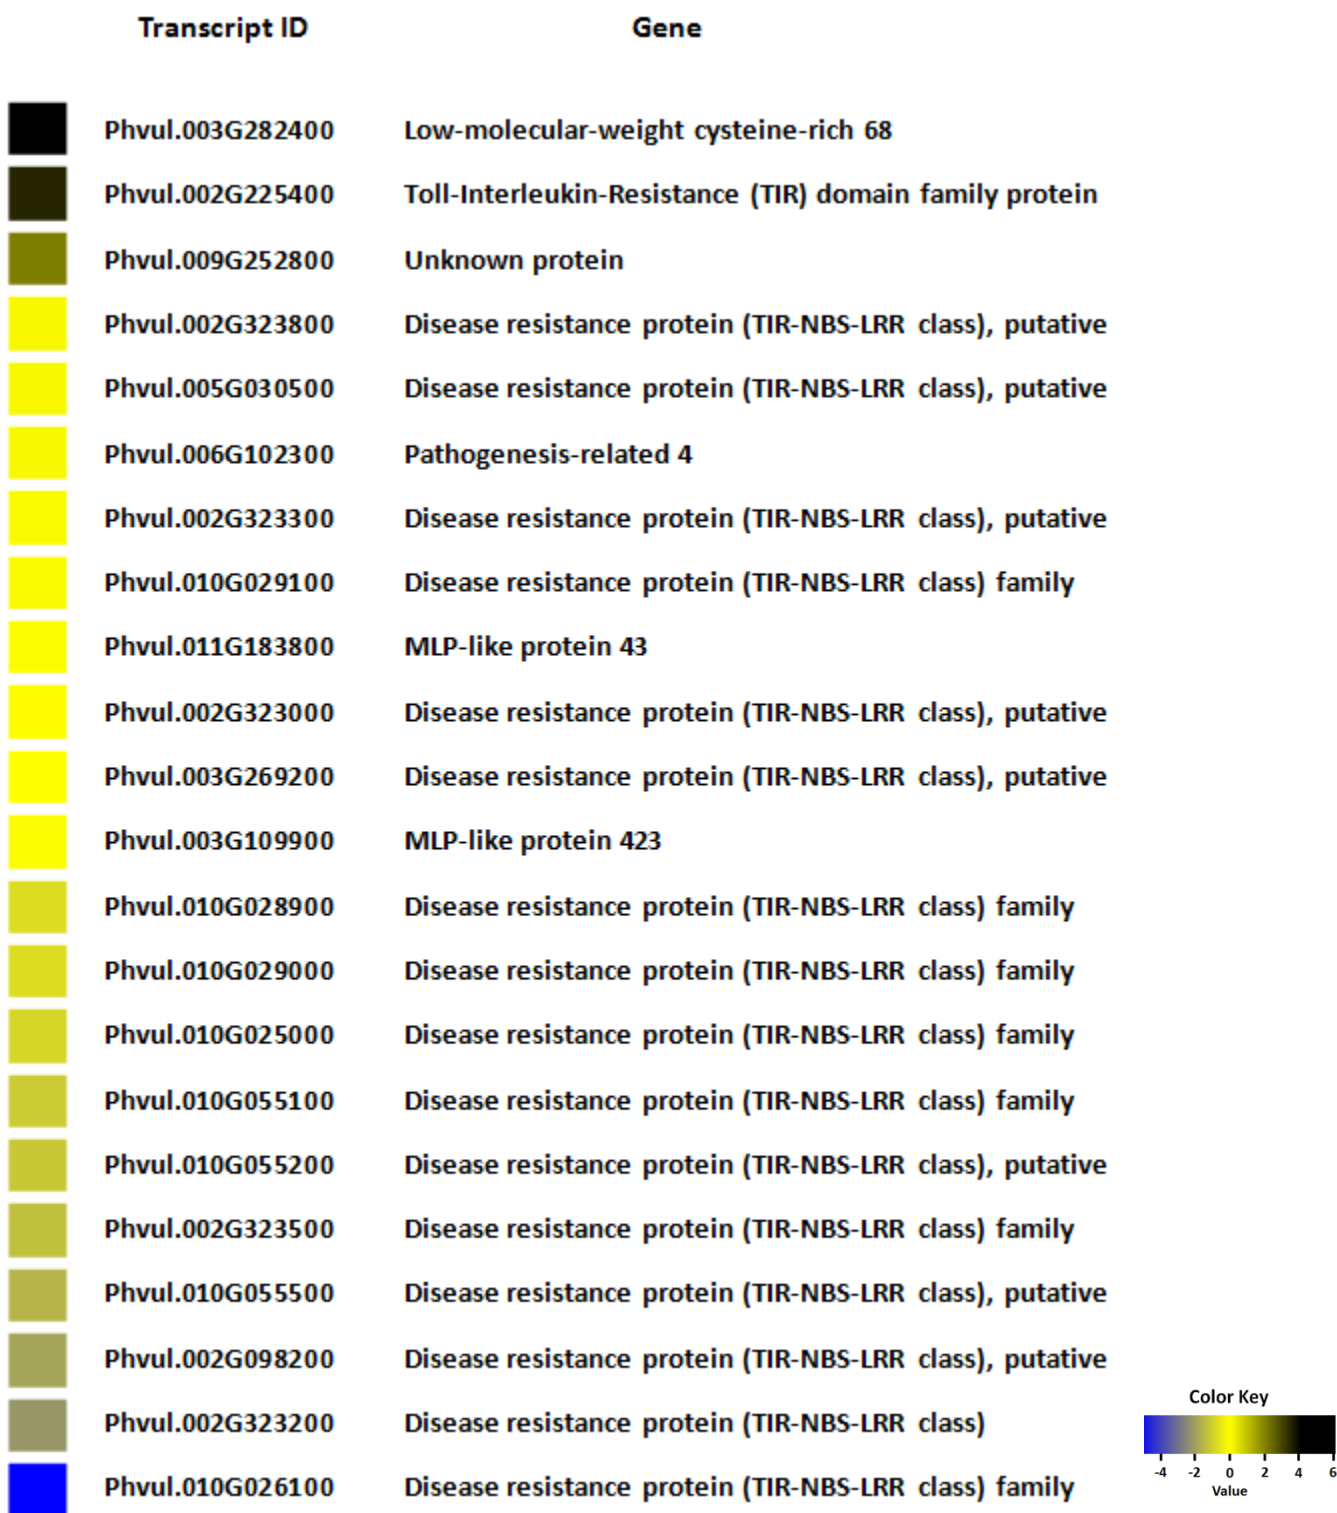

### S5 Fig. DEGs of defense-responsive genes during root symbioses.

Expression profile of unique defense-responsive genes in *P. vulgaris* roots colonized by (A) AMF and (B) rhizobia. Expression profile showing upregulated and downregulated DEGs obtained from GO analysis. Statistically significant DEGs were identified using an unpaired *t*-test ( $p < 0.05$ ) in symbiont treatment over controls (S3 Table). Fold-change values (over control) were used to plot heat maps. Color bar scale shows the fold-change range with red and green representing downregulation and upregulation, respectively.
