# Supplementary material for: Differentially expressed genes in mycorrhized and nodulated roots of common bean are associated with defense, cell wall architecture, N metabolism, and P metabolism
Source: PubMed Central journal article supplement (PMC5542541; doi:10.1371/journal.pone.0182328), 2017-08-03
Supplement: pone.0182328.s007.pdf [file pone.0182328.s007.pdf]

# S7 Fig

**A****Transcript ID****Gene**

|                  |                                                             |
|------------------|-------------------------------------------------------------|
| Phvul.003G147700 | Xyloglucan endotransglucosylase/hydrolase family protein    |
| Phvul.003G147400 | Xyloglucan endotransglycosylase 6                           |
| Phvul.005G011900 | Plant invertase/pectin methylesterase inhibitor superfamily |
| Phvul.001G209100 | Plant invertase/pectin methylesterase inhibitor superfamily |
| Phvul.003G137600 | Xyloglucan endotransglycosylase 6                           |
| Phvul.003G052400 | Xyloglucan:xyloglucosyl transferase 33                      |
| Phvul.003G147600 | Xyloglucan endotransglucosylase/hydrolase family protein    |
| Phvul.011G024800 | Expansin-like A2                                            |
| Phvul.003G015600 | Pectin lyase-like superfamily protein                       |
| Phvul.009G203300 | Reversibly glycosylated polypeptide 3                       |
| Phvul.007G210400 | Plant invertase/pectin methylesterase inhibitor superfamily |
| Phvul.003G147500 | Xyloglucan endotransglycosylase 6                           |
| Phvul.009G250600 | Plant invertase/pectin methylesterase inhibitor superfamily |
| Phvul.010G123100 | Pectin methylesterase 3                                     |
| Phvul.011G117500 | Expansin B3                                                 |
| Phvul.001G265300 | Xyloglucan endotransglucosylase/hydrolase 15                |
| Phvul.009G222100 | Plant invertase/pectin methylesterase inhibitor superfamily |
| Phvul.007G212000 | Pectin lyase-like superfamily protein                       |
| Phvul.011G189000 | Root hair specific 12                                       |
| Phvul.005G007800 | Plant invertase/pectin methylesterase inhibitor superfamily |
| Phvul.003G213800 | Expansin A18                                                |
| Phvul.002G270900 | Plant invertase/pectin methylesterase inhibitor superfamily |
| Phvul.009G222700 | Plant invertase/pectin methylesterase inhibitor superfamily |
| Phvul.002G152900 | Expansin A7                                                 |
| Phvul.007G198200 | Plant invertase/pectin methylesterase inhibitor superfamily |
| Phvul.011G085200 | Xyloglucan endotransglucosylase/hydrolase 32                |
| Phvul.009G233200 | Xyloglucan endotransglycosylase 6                           |
| Phvul.010G079900 | Plant invertase/pectin methylesterase inhibitor superfamily |

**B**

| Transcript ID    | Gene                                                        |
|------------------|-------------------------------------------------------------|
| Phvul.008G277900 | Pectin lyase-like superfamily protein                       |
| Phvul.002G083600 | Expansin A15                                                |
| Phvul.003G224700 | Expansin-like B1                                            |
| Phvul.009G222600 | Plant invertase/pectin methylesterase inhibitor superfamily |
| Phvul.005G184400 | Plant invertase/pectin methylesterase inhibitor superfamily |
| Phvul.007G235300 | Expansin-like B2                                            |
| Phvul.003G231900 | Xyloglucan endotransglucosylase/hydrolase 6                 |
| Phvul.005G012000 | Root hair specific -like12                                  |
| Phvul.001G179900 | Xyloglucan endotransglucosylase/hydrolase 32                |

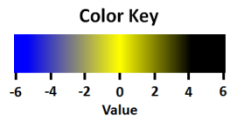

**S7 Fig. DEGs of cell wall-related genes during root symbioses.** Expression profile of unique cell wall-related genes in *P. vulgaris* roots colonized by (A) AMF and (B) rhizobia. Expression profile showing upregulated and downregulated DEGs obtained from GO analysis. Statistically significant DEGs were identified using an unpaired *t*-test ( $p < 0.05$ ), in symbiont treatment over controls (S3 Table). Fold-change values (over control) were used to plot heat maps. Color bar scale shows the fold-change range with red and green representing downregulation and upregulation, respectively.
