# Supplementary material for: Differentially expressed genes in mycorrhized and nodulated roots of common bean are associated with defense, cell wall architecture, N metabolism, and P metabolism
Source: PubMed Central journal article supplement (PMC5542541; doi:10.1371/journal.pone.0182328), 2017-08-03
Supplement: pone.0182328.s008.pdf [file pone.0182328.s008.pdf]

A

## S8 Fig

| Transcript ID    | Gene                                                                     | Transcript ID    | Gene                                                                          |
|------------------|--------------------------------------------------------------------------|------------------|-------------------------------------------------------------------------------|
| Phvul.002G267800 | Integrase-type DNA-binding superfamily protein                           | Phvul.010G148700 | HD-ZIP IV family of homeobox-leucine zipper protein with lipid START domain   |
| Phvul.009G203400 | AGAMOUS-like 8                                                           | Phvul.007G066500 | Integrase-type DNA-binding superfamily protein                                |
| Phvul.002G160100 | WRKY DNA-binding protein 27                                              | Phvul.009G152800 | NAC domain containing protein 102                                             |
| Phvul.001G192000 | NAC domain containing protein 90                                         | Phvul.001G044500 | Integrase-type DNA-binding superfamily protein                                |
| Phvul.011G119500 | Basic helix-loop-helix (bHLH) DNA-binding superfamily protein            | Phvul.003G070300 | Homeobox 1                                                                    |
| Phvul.004G046200 | ATPase E1-E2 type family protein / haloacid dehalogenase-like hydrolase  | Phvul.002G036000 | Integrase-type DNA-binding superfamily protein                                |
| Phvul.002G153900 | Integrase-type DNA-binding superfamily protein                           | Phvul.006G181500 | NAC domain containing protein 73                                              |
| Phvul.003G212700 | Integrase-type DNA-binding superfamily protein                           | Phvul.008G194600 | NAC domain containing protein 42                                              |
| Phvul.003G223600 | Integrase-type DNA-binding superfamily protein                           | Phvul.001G062100 | Dof-type zinc finger DNA-binding family protein                               |
| Phvul.006G204200 | GTP cyclohydrolase II                                                    | Phvul.009G137600 | Sigma factor E                                                                |
| Phvul.005G155800 | Homolog of carrot EP3-3 chitinase                                        | Phvul.009G190200 | Homeobox 1                                                                    |
| Phvul.002G256500 | Signal responsive 1                                                      | Phvul.004G083100 | GATA transcription factor 4                                                   |
| Phvul.004G075500 | NAC domain containing protein 41,NAC domain containing protein 83        | Phvul.003G292400 | Redox responsive transcription factor 1                                       |
| Phvul.002G035100 | Integrase-type DNA-binding superfamily protein                           | Phvul.001G164900 | Auxin-induced protein 13                                                      |
| Phvul.010G057900 | WRKY DNA-binding protein 70                                              | Phvul.002G011400 | Calcium ATPase 2                                                              |
| Phvul.004G024700 | AAA-ATPase 1                                                             | Phvul.002G196800 | WRKY DNA-binding protein 28                                                   |
| Phvul.003G268600 | Basic chitinase                                                          | Phvul.008G037900 | NAC domain containing protein 100                                             |
| Phvul.010G015400 | Delta 1-pyrroline-5-carboxylate synthase 2                               | Phvul.001G120200 | Transcription elongation factor (TFIIS) family protein                        |
| Phvul.002G317400 | ATPase E1-E2 type family protein / haloacid dehalogenase-like hydrolase  | Phvul.001G214400 | WRKY DNA-binding protein 23                                                   |
| Phvul.011G014000 | Cytokinin oxidase/dehydrogenase 6                                        | Phvul.009G231600 | Basic helix-loop-helix (bHLH) DNA-binding family protein                      |
| Phvul.009G137500 | WRKY family transcription factor                                         | Phvul.001G216700 | S-adenosylmethionine synthetase 1                                             |
| Phvul.010G117900 | Basic helix-loop-helix (bHLH) DNA-binding family protein                 | Phvul.005G011600 | ABA-responsive element binding protein 3                                      |
| Phvul.009G179600 | Basic helix-loop-helix (bHLH) DNA-binding superfamily protein            | Phvul.001G084000 | Integrase-type DNA-binding superfamily protein                                |
| Phvul.002G271000 | Basic helix-loop-helix (bHLH) DNA-binding superfamily protein            | Phvul.011G101900 | WRKY family transcription factor                                              |
| Phvul.002G149500 | DORNROSCHEN-like                                                         | Phvul.001G106400 | Cycling DOF factor 3                                                          |
| Phvul.002G206300 | Xylem NAC domain 1                                                       | Phvul.002G007500 | Basic helix-loop-helix (bHLH) DNA-binding superfamily protein                 |
| Phvul.007G193400 | Integrase-type DNA-binding superfamily protein                           | Phvul.004G004900 | NAC (No Apical Meristem) domain transcriptional regulator superfamily protein |
| Phvul.003G235500 | Calcium ATPase 2                                                         | Phvul.002G307000 | NAC domain containing protein 75                                              |
| Phvul.001G039900 | WRKY DNA-binding protein 50                                              | Phvul.001G247200 | Arogenate dehydrogenase                                                       |
| Phvul.001G187100 | Integrase-type DNA-binding superfamily protein                           | Phvul.009G123300 | Integrase-type DNA-binding superfamily protein                                |
| Phvul.004G120500 | Homeobox-leucine zipper family protein / lipid-binding START domain      | Phvul.002G260400 | Endoplasmic reticulum-type calcium-transporting ATPase 3                      |
| Phvul.009G084400 | Integrase-type DNA-binding superfamily protein                           | Phvul.009G039000 | NAC transcription factor-like 9                                               |
| Phvul.003G153000 | Class I glutamine amidotransferase-like superfamily protein              | Phvul.002G163700 | Integrase-type DNA-binding superfamily protein                                |
| Phvul.003G116300 | WRKY DNA-binding protein 48                                              | Phvul.006G119100 | WRKY DNA-binding protein 48                                                   |
| Phvul.007G170200 | Unknown protein                                                          | Phvul.002G316500 | NAC domain containing protein 58                                              |
| Phvul.006G179700 | Integrase-type DNA-binding superfamily protein                           | Phvul.002G265400 | WRKY DNA-binding protein 51                                                   |
| Phvul.003G111800 | AP2/B3 transcription factor family protein                               | Phvul.005G138900 | Phototropin 1                                                                 |
| Phvul.001G216600 | S-adenosylmethionine synthetase 2                                        | Phvul.004G169400 | AP2/B3-like transcriptional factor family protein                             |
| Phvul.003G167700 | Auxin-induced protein 13                                                 | Phvul.007G223400 | Heat shock transcription factor A3                                            |
| Phvul.002G019100 | Heat shock factor 4                                                      | Phvul.002G186000 | Glutamate decarboxylase                                                       |
| Phvul.003G119800 | Calmodulin-binding transcription activator with CG-1 and Ankyrin domains | Phvul.006G047300 | WRKY family transcription factor                                              |
| Phvul.005G181800 | WRKY DNA-binding protein 40                                              | Phvul.006G110200 | Cytokinin response factor 4                                                   |
| Phvul.003G140800 | Basic helix-loop-helix (bHLH) DNA-binding superfamily protein            | Phvul.010G070200 | HSI2-like 1                                                                   |
| Phvul.006G188900 | NAC domain containing protein 25                                         | Phvul.007G148000 | Methionine adenosyltransferase 3                                              |
| Phvul.007G272900 | Integrase-type DNA-binding superfamily protein                           | Phvul.003G231200 | Basic helix-loop-helix (bHLH) DNA-binding superfamily protein                 |
| Phvul.004G042400 | AGAMOUS-like 8                                                           | Phvul.001G206100 | Thiamin pyrophosphokinase1                                                    |
| Phvul.002G185800 | Glutamate decarboxylase                                                  | Phvul.006G114000 | ABA-inducible BHLH-type transcription factor                                  |
| Phvul.006G169600 | K-box region and MADS-box transcription factor family protein            | Phvul.006G074600 | WRKY DNA-binding protein 33                                                   |
| Phvul.009G235700 | Basic helix-loop-helix (bHLH) DNA-binding superfamily protein            | Phvul.009G138600 | WRKY DNA-binding protein 13                                                   |
| Phvul.006G179800 | Ethylene responsive element binding factor 2                             | Phvul.002G185900 | Glutamate decarboxylase                                                       |

| Transcript ID   | Gene                                                                             | Transcript ID   | Gene                                                               |
|-----------------|----------------------------------------------------------------------------------|-----------------|--------------------------------------------------------------------|
| Phvu.008G115100 | Delta 1-pyrroline-5-carboxylate synthase 2                                       | Phvu.009G239100 | LYSYL-TRNA synthetase 1                                            |
| Phvu.004G076900 | Arabidopsis NAC domain containing protein 87                                     | Phvu.009G204000 | OBF binding protein 4                                              |
| Phvu.002G187900 | Homeodomain GLABROUS 12                                                          | Phvu.008G202500 | Heat shock transcription factor B4                                 |
| Phvu.007G224800 | Homeobox 51                                                                      | Phvu.005G048700 | Aldolase-type TIM barrel family protein                            |
| Phvu.007G102800 | AP2/B3 transcription factor family protein                                       | Phvu.001G218600 | Chitinase family protein                                           |
| Phvu.005G173000 | AUX/IAA transcriptional regulator family protein                                 | Phvu.007G208500 | Phytochrome interacting factor 3                                   |
| Phvu.002G215500 | AGAMOUS-like 21                                                                  | Phvu.009G026400 | Serine hydroxymethyltransferase 4                                  |
| Phvu.002G114100 | Basic chitinase                                                                  | Phvu.005G170600 | Integrase-type DNA-binding superfamily protein                     |
| Phvu.007G176700 | AUX/IAA transcriptional regulator family protein                                 | Phvu.007G019300 | Hydroxypyruvate reductase                                          |
| Phvu.009G136400 | Dof-type zinc finger DNA-binding family protein                                  | Phvu.008G222700 | Basic helix-loop-helix (bHLH) DNA-binding superfamily protein      |
| Phvu.007G135900 | Integrase-type DNA-binding superfamily protein                                   | Phvu.007G271700 | Signal transduction histidine kinase, hybrid-type, ethylene sensor |
| Phvu.002G055700 | Ethylene responsive element binding factor 1                                     | Phvu.002G240900 | WRKY DNA-binding protein 65                                        |
| Phvu.009G037300 | K-box region and MADS-box transcription factor family protein                    | Phvu.003G180000 | Related to AP2 11                                                  |
| Phvu.008G176200 | Class-II DAHP synthetase family protein                                          | Phvu.003G098300 | tRNA/rRNA methyltransferase (SpoU) family protein                  |
| Phvu.002G160000 | Sporulation 11-2                                                                 | Phvu.002G064100 | KNOTTED1-like homeobox gene 6                                      |
| Phvu.001G100500 | Arabidopsis NAC domain containing protein 87                                     | Phvu.011G177100 | Hydroxymethylbilan synthase                                        |
| Phvu.011G024700 | NAC domain containing protein 36                                                 | Phvu.002G249900 | 6-phosphogluconate dehydrogenase family protein                    |
| Phvu.010G050900 | H(+)-ATPase 11                                                                   | Phvu.008G290000 | AAA-type ATPase family protein                                     |
| Phvu.008G098900 | Related to AP2 1                                                                 | Phvu.001G213600 | WRKY DNA-binding protein 69                                        |
| Phvu.003G242900 | Basic helix-loop-helix (bHLH) DNA-binding superfamily protein                    | Phvu.009G228000 | Growth-regulating factor 5                                         |
| Phvu.005G181300 | Basic helix-loop-helix (bHLH) DNA-binding superfamily protein                    | Phvu.008G144300 | Basic helix-loop-helix (bHLH) DNA-binding superfamily protein      |
| Phvu.005G084500 | NAC (No Apical Meristem) domain transcriptional regulator superfamily protein    | Phvu.010G146600 | Integrase-type DNA-binding superfamily protein                     |
| Phvu.008G027900 | K-box region and MADS-box transcription factor family protein                    | Phvu.003G189600 | Pyridine nucleotide-disulphide oxidoreductase family protein       |
| Phvu.003G027100 | NAC (No Apical Meristem) domain transcriptional regulator superfamily protein    | Phvu.003G106200 | Copper amine oxidase family protein                                |
| Phvu.009G047500 | Dof-type zinc finger DNA-binding family protein                                  | Phvu.006G101700 | bZIP transcription factor family protein                           |
| Phvu.001G128800 | Cytokinin oxidase/dehydrogenase 1                                                | Phvu.008G184800 | beta HLH protein 93                                                |
| Phvu.007G095000 | Auxin response factor 16                                                         | Phvu.007G135300 | Integrase-type DNA-binding superfamily protein                     |
| Phvu.007G095300 | GATA transcription factor 4                                                      | Phvu.001G254000 | Homeobox protein 16                                                |
| Phvu.006G087600 | Glutamate decarboxylase                                                          | Phvu.009G018700 | ABA-responsive element binding protein 3                           |
| Phvu.002G209300 | Calmodulin-binding transcription activator protein with CG-1 and Ankyrin domains | Phvu.008G042200 | Homeobox 3                                                         |
| Phvu.010G114800 | Basic helix-loop-helix (bHLH) DNA-binding superfamily protein                    | Phvu.007G241600 | Integrase-type DNA-binding superfamily protein                     |
| Phvu.007G056600 | Amine oxidase 1                                                                  | Phvu.006G015700 | Heat shock transcription factor B4                                 |
| Phvu.009G186000 | NAC domain containing protein 100                                                | Phvu.002G316900 | BR enhanced expression 3                                           |
| Phvu.002G035900 | Integrase-type DNA-binding superfamily protein                                   | Phvu.010G153200 | DNA photolyase family protein                                      |
| Phvu.005G116000 | WRKY family transcription factor                                                 | Phvu.004G043900 | Heat shock protein 101                                             |
| Phvu.003G107900 | Ethylene-responsive element binding protein                                      | Phvu.009G208600 | Unknown protein                                                    |
| Phvu.003G026800 | Basic helix-loop-helix (bHLH) DNA-binding superfamily protein                    | Phvu.004G045800 | Basic leucine-zipper 42                                            |
| Phvu.001G034200 | Homeobox gene 1                                                                  | Phvu.001G022900 | Heat shock transcription factor B4                                 |
| Phvu.009G099600 | N-acetyl-l-glutamate kinase                                                      | Phvu.003G233200 | Basic leucine-zipper 5                                             |
| Phvu.001G226500 | GATA transcription factor 16                                                     | Phvu.010G092300 | Related to AP2 11                                                  |
| Phvu.009G065800 | Heat shock transcription factor B4                                               | Phvu.001G160100 | Integrase-type DNA-binding superfamily protein                     |
| Phvu.008G019600 | Related to AP2 6l                                                                | Phvu.009G102000 | FAD-dependent oxidoreductase family protein                        |
| Phvu.006G093900 | Basic helix-loop-helix (bHLH) DNA-binding superfamily protein                    | Phvu.009G002200 | GLN phosphoribosyl pyrophosphate amidotransferase 1                |
| Phvu.001G121200 | Basic helix-loop-helix (bHLH) DNA-binding superfamily protein                    | Phvu.002G030800 | GATA type zinc finger transcription factor family protein          |
| Phvu.009G110400 | GATA transcription factor 12                                                     | Phvu.007G032200 | Indole-3-acetic acid inducible 32                                  |
| Phvu.001G154700 | Heat shock transcription factor A6B                                              | Phvu.003G222600 | Integrase-type DNA-binding superfamily protein                     |
| Phvu.007G278200 | Heat shock transcription factor A6B                                              | Phvu.003G097900 | Adenosylmethionine decarboxylase family protein                    |
| Phvu.008G169100 | ABA-responsive element binding protein 3                                         | Phvu.006G149700 | ATPase, F1 complex, gamma subunit protein                          |
| Phvu.002G254500 | Integrase-type DNA-binding superfamily protein                                   | Phvu.003G264600 | Histidine kinase 1                                                 |
| Phvu.004G044100 | Heat shock protein 101                                                           | Phvu.009G075100 | Branched-chain amino acid transaminase 2                           |
|                 |                                                                                  | Phvu.005G052500 | Nicotianamine synthase 4                                           |

**B**

| Transcript ID    | Gene                                                          | Transcript ID    | Gene                                                                          |
|------------------|---------------------------------------------------------------|------------------|-------------------------------------------------------------------------------|
| Phvul.003G136400 | Cytokinin oxidase 3                                           | Phvul.001G218800 | Phytochrome interacting factor 3                                              |
| Phvul.008G237400 | Glutamine synthase clone R1                                   | Phvul.010G050800 | Ethylene-responsive element binding factor 13                                 |
| Phvul.002G068500 | Werner syndrome-like exonuclease                              | Phvul.011G070300 | Phototropin 1                                                                 |
| Phvul.009G231800 | Cytokinin oxidase 2                                           | Phvul.006G186700 | Allantoinase                                                                  |
| Phvul.011G064900 | WUSCHEL related homeobox 2                                    | Phvul.002G142800 | Beta HLH protein 93                                                           |
| Phvul.007G048000 | AGAMOUS-like 62                                               | Phvul.003G032800 | Histone acetyltransferase of the CBP family 12                                |
| Phvul.009G196900 | Integrase-type DNA-binding superfamily protein                | Phvul.001G111800 | Related to AP2 11                                                             |
| Phvul.003G028800 | bZIP transcription factor family protein                      | Phvul.002G007900 | Tubulin alpha-2 chain                                                         |
| Phvul.007G028100 | Isopentenyltransferase 1                                      | Phvul.009G004800 | BEL1-like homeodomain 6                                                       |
| Phvul.009G260100 | AP2/B3-like transcriptional factor family protein             | Phvul.007G056500 | Copper amine oxidase family protein                                           |
| Phvul.009G145800 | Beta HLH protein 93                                           | Phvul.003G284500 | Basic helix-loop-helix (bHLH) DNA-binding superfamily protein                 |
| Phvul.003G068700 | WRKY DNA-binding protein 72                                   | Phvul.002G216700 | Basic helix-loop-helix (bHLH) DNA-binding superfamily protein                 |
| Phvul.006G065300 | ThiaminC                                                      | Phvul.009G002200 | Phosphoribosyl pyrophosphate amidotransferase                                 |
| Phvul.003G268500 | Basic chitinase                                               | Phvul.002G027200 | Homeobox protein 40                                                           |
| Phvul.009G170600 | BTB and TAZ domain protein 2                                  | Phvul.006G155800 | Glutamine synthetase 2                                                        |
| Phvul.009G077400 | Glycine decarboxylase P-protein 2                             | Phvul.005G148000 | Xanthine dehydrogenase 1                                                      |
| Phvul.008G043500 | Integrase-type DNA-binding superfamily protein                | Phvul.011G180500 | DNA glycosylase superfamily protein                                           |
| Phvul.002G229800 | AP2/B3-like transcriptional factor family protein             | Phvul.002G088400 | Basic helix-loop-helix (bHLH) DNA-binding superfamily protein                 |
| Phvul.006G173500 | Related to AP2 11                                             | Phvul.008G004200 | Glycine ligase                                                                |
| Phvul.002G048200 | Protodermal factor 2                                          | Phvul.002G273500 | Phosphoribosylaminoimidazole carboxylase                                      |
| Phvul.008G045100 | Homeobox-leucine zipper protein 3                             | Phvul.011G050500 | AP2/B3-like transcriptional factor family protein                             |
| Phvul.010G120900 | AP2/B3-like transcriptional factor family protein             | Phvul.008G289900 | Coproporphyrinogen III oxidase                                                |
| Phvul.001G229500 | Glutamine synthetase                                          | Phvul.003G030500 | Endonuclease 2                                                                |
| Phvul.007G234300 | Uricase                                                       | Phvul.009G116500 | Basic chitinase                                                               |
| Phvul.002G329800 | Beta-6 tubulin                                                | Phvul.003G286400 | beta HLH protein 93                                                           |
| Phvul.006G013200 | Homeobox protein 6                                            | Phvul.007G019500 | AP2/B3-like transcriptional factor family protein                             |
| Phvul.008G129500 | Dicer-like 2                                                  | Phvul.001G156600 | Indole-3-acetic acid inducible 14                                             |
| Phvul.003G182700 | K-box region and MADS-box transcription factor family protein | Phvul.004G047600 | G-box binding factor 4                                                        |
| Phvul.007G019000 | Basic helix-loop-helix (bHLH) DNA-binding superfamily protein | Phvul.009G053900 | NADH-dependent glutamate synthase 2 (GOGAT)                                   |
| Phvul.006G069300 | Glutamine-dependent asparagine synthase 1                     | Phvul.004G070100 | Aspartate kinase family protein,aspartate kinase 1                            |
| Phvul.007G086600 | Integrase-type DNA-binding superfamily protein                | Phvul.005G161900 | Basic helix-loop-helix (bHLH) DNA-binding superfamily protein                 |
| Phvul.009G127000 | Response regulator 9                                          | Phvul.002G056300 | Homeobox-leucine zipper protein 4 (HB-4) / HD-ZIP protein                     |
| Phvul.003G207500 | AAA-type ATPase family protein                                | Phvul.010G011900 | POX (plant homeobox) family protein                                           |
| Phvul.006G145800 | KNOX/ELK homeobox transcription factor                        | Phvul.002G322300 | Response regulator 14                                                         |
| Phvul.002G089700 | WRKY DNA-binding protein 9                                    | Phvul.008G270500 | WRKY family transcription factor                                              |
| Phvul.005G114600 | Homeodomain GLABROUS 2                                        | Phvul.005G044600 | NAC (No Apical Meristem) domain transcriptional regulator superfamily protein |
| Phvul.003G124600 | Indole-3-acetic acid inducible 31                             | Phvul.002G112200 | K-box region and MADS-box transcription factor family protein                 |
| Phvul.009G232700 | GATA type zinc finger transcription factor family protein     | Phvul.007G208900 | Chitinase family protein                                                      |
| Phvul.009G033800 | Basic helix-loop-helix (bHLH) DNA-binding superfamily protein | Phvul.002G070300 | Domains rearranged methylase 1                                                |
| Phvul.009G116700 | Basic chitinase                                               | Phvul.007G272800 | Integrase-type DNA-binding superfamily protein                                |
| Phvul.009G060200 | Cytokinin oxidase 5                                           | Phvul.002G161000 | P-loop containing nucleoside triphosphate hydrolases superfamily protein      |
| Phvul.008G181500 | Basic helix-loop-helix (bHLH) DNA-binding superfamily protein | Phvul.002G283600 | NAC domain containing protein 83                                              |
| Phvul.009G013900 | K-box region and MADS-box transcription factor family protein | Phvul.011G091400 | C-repeat/DRE binding factor 2                                                 |
| Phvul.005G027100 | Response regulator 9                                          | Phvul.006G114900 | Dof-type zinc finger DNA-binding family protein                               |
| Phvul.011G157500 | Tyrosine transaminase family protein                          | Phvul.002G052100 | Basic helix-loop-helix (bHLH) DNA-binding superfamily protein                 |
| Phvul.006G105100 | Zinc ion binding;DNA binding                                  | Phvul.003G035100 | DNA glycosylase superfamily protein                                           |
| Phvul.008G185100 | Glutamyl-tRNA reductase family protein                        | Phvul.011G003900 | NAC domain containing protein 70                                              |
| Phvul.001G193100 | AP2/B3-like transcriptional factor family protein             | Phvul.003G159200 | H(+)-ATPase 8                                                                 |
| Phvul.003G250500 | BEL1-like homeodomain 4                                       | Phvul.001G156500 | AUX/IAA transcriptional regulator family protein                              |
| Phvul.002G118900 | hydroxy methylglutaryl CoA reductase 1                        | Phvul.001G099400 | DEAD/DEAH box helicase, putative                                              |

| Transcript ID    | Gene                                                                        | Transcript ID    | Gene                                                                    |
|------------------|-----------------------------------------------------------------------------|------------------|-------------------------------------------------------------------------|
| Phvul.002G309200 | AGAMOUS-like 29                                                             | Phvul.008G236100 | RNA polymerase subunit beta                                             |
| Phvul.006G015500 | P-loop containing nucleoside triphosphate hydrolases superfamily protein    | Phvul.003G132000 | RNA polymerase III RPC4                                                 |
| Phvul.008G122100 | AP2/B3-like transcriptional factor family protein                           | Phvul.007G229600 | Basic-leucine zipper (bZIP) transcription factor family protein         |
| Phvul.002G061000 | NAC 007                                                                     | Phvul.007G089600 | Vascular related NAC-domain protein 7                                   |
| Phvul.003G251800 | Homeobox protein 40                                                         | Phvul.007G208800 | Indole-3-acetic acid inducible 30                                       |
| Phvul.005G041900 | Cofactor of nitrate reductase and xanthine dehydrogenase 2                  | Phvul.009G169300 | AP2/B3-like transcriptional factor family protein                       |
| Phvul.009G077500 | Cytokinin-responsive gata factor 1                                          | Phvul.008G188200 | Ribonuclease P family protein / Rpp14 family protein                    |
| Phvul.002G110600 | Basic leucine-zipper 42                                                     | Phvul.004G077400 | NAC domain containing protein 47                                        |
| Phvul.009G162000 | Basic helix-loop-helix (bHLH) DNA-binding superfamily protein               | Phvul.009G080000 | WRKY DNA-binding protein 50                                             |
| Phvul.005G105200 | Integrase-type DNA-binding superfamily protein                              | Phvul.002G085700 | No Apical Meristem domain transcriptional regulator superfamily protein |
| Phvul.008G284200 | Phytochromobilin:ferredoxin oxidoreductase, phytochromobilin synthase (HY2) | Phvul.002G266400 | WRKY DNA-binding protein 13                                             |
| Phvul.001G032500 | Pseudouridine synthase family protein                                       | Phvul.005G152500 | Endonuclease III 2                                                      |
| Phvul.009G260800 | Autoinhibited H(+)-ATPase isoform 10                                        | Phvul.001G050500 | Adenine phosphoribosyl transferase 2                                    |
| Phvul.001G126400 | Basic helix-loop-helix (bHLH) DNA-binding superfamily protein               | Phvul.003G274800 | Phototropin 2                                                           |
| Phvul.002G176000 | DEAD/DEAH box RNA helicase family protein                                   | Phvul.002G143900 | AGAMOUS-like 21                                                         |
| Phvul.008G070300 | Ribosomal RNA adenine dimethylase family protein                            | Phvul.005G047300 | NAC domain containing protein 20                                        |
| Phvul.003G007500 | AP2/B3-like transcriptional factor family protein                           | Phvul.003G037100 | DNA glycosylase superfamily protein                                     |
| Phvul.002G309500 | AGAMOUS-like 91                                                             | Phvul.006G127100 | Dicer-like 2                                                            |
| Phvul.003G040500 | Copper amine oxidase family protein                                         | Phvul.001G106000 | Cyclin/Brf1-like TBP-binding protein                                    |
| Phvul.005G140700 | DHBP synthase RibB-like alpha/beta domain;GTP cyclohydrolase II             | Phvul.002G305000 | 1-amino-cyclopropane-1-carboxylate synthase 7                           |
| Phvul.001G173700 | WRKY family transcription factor family protein                             | Phvul.010G073400 | APRATAVIN-like                                                          |
| Phvul.009G065700 | Basic helix-loop-helix (bHLH) DNA-binding superfamily protein               | Phvul.005G007900 | NAC 007                                                                 |
| Phvul.001G106700 | WUSCHEL related homeobox 11                                                 |                  |                                                                         |
| Phvul.009G176700 | KNOTTED-like from Arabidopsis thaliana                                      |                  |                                                                         |
| Phvul.010G158300 | Basic helix-loop-helix (bHLH) DNA-binding superfamily protein               |                  |                                                                         |
| Phvul.003G182800 | K-box region and MADS-box transcription factor family protein               |                  |                                                                         |
| Phvul.010G120700 | NAC transcription factor-like 9                                             |                  |                                                                         |
| Phvul.005G080400 | WRKY DNA-binding protein 70                                                 |                  |                                                                         |
| Phvul.002G270500 | Amino acid kinase family protein                                            |                  |                                                                         |
| Phvul.002G100800 | Transcriptional factor B3 family protein                                    |                  |                                                                         |
| Phvul.006G106100 | Ethylene response factor 1                                                  |                  |                                                                         |
| Phvul.007G215000 | Signal transduction histidine kinase                                        |                  |                                                                         |
| Phvul.001G160200 | Ethylene response factor 1                                                  |                  |                                                                         |
| Phvul.009G213800 | MADS-box transcription factor family protein                                |                  |                                                                         |
| Phvul.003G153900 | DNA/RNA polymerases superfamily protein                                     |                  |                                                                         |
| Phvul.001G196100 | Dof-type zinc finger DNA-binding family protein                             |                  |                                                                         |
| Phvul.006G202200 | K-box region and MADS-box transcription factor family protein               |                  |                                                                         |
| Phvul.010G151700 | Indole-3-acetic acid inducible 19                                           |                  |                                                                         |
| Phvul.010G018200 | HY5-homolog                                                                 |                  |                                                                         |
| Phvul.008G041800 | Basic helix-loop-helix (bHLH) DNA-binding family protein                    |                  |                                                                         |
| Phvul.009G108300 | Phosphorylase superfamily protein                                           |                  |                                                                         |
| Phvul.004G143100 | NAC domain containing protein 57                                            |                  |                                                                         |
| Phvul.010G131000 | DNA-directed RNA polymerase family protein                                  |                  |                                                                         |
| Phvul.010G109700 | Glyoxylate reductase 1                                                      |                  |                                                                         |
| Phvul.010G045900 | Paxneb protein-related                                                      |                  |                                                                         |
| Phvul.010G088100 | AGAMOUS-like 14                                                             |                  |                                                                         |
| Phvul.006G196600 | Basic helix-loop-helix (bHLH) DNA-binding superfamily protein               |                  |                                                                         |
| Phvul.008G203400 | TATA binding protein associated factor 21kDa subunit                        |                  |                                                                         |
| Phvul.008G239700 | Glutamate decarboxylase                                                     |                  |                                                                         |
| Phvul.005G168900 | HD-ZIP IV family of homeobox-leucine zipper protein with lipid START domain |                  |                                                                         |

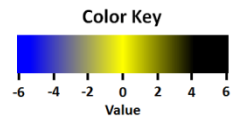

**S8 Fig. DEGs of N metabolism genes during root symbioses.** Expression profile of unique N metabolism genes in *P. vulgaris* roots colonized by (A) AMF and (B) rhizobia. Expression profile showing upregulated and downregulated DEGs obtained from GO analysis. Statistically significant DEGs were identified using an unpaired *t*-test ( $p < 0.05$ ), in symbiont treatment over controls (S3 Table). Fold-change values (over control) were used to plot heat maps. Color bar scale shows the fold-change range with red and green representing downregulation and upregulation, respectively.
