# Supplementary material for: Differentially expressed genes in mycorrhized and nodulated roots of common bean are associated with defense, cell wall architecture, N metabolism, and P metabolism
Source: PubMed Central journal article supplement (PMC5542541; doi:10.1371/journal.pone.0182328), 2017-08-03
Supplement: pone.0182328.s010.pdf [file pone.0182328.s010.pdf]

A

## S10 Fig

| Transcript ID    | Gene                                                            | Transcript ID    | Gene                                                     |
|------------------|-----------------------------------------------------------------|------------------|----------------------------------------------------------|
| Phvul.002G123500 | Leucine-rich repeat protein kinase family protein               | Phvul.007G158400 | Pyrophosphorylase 4                                      |
| Phvul.010G127500 | Leucine-rich repeat protein kinase family protein               | Phvul.002G276700 | Diacylglycerol kinase 2                                  |
| Phvul.008G174900 | Protein kinase superfamily protein                              | Phvul.007G137800 | PEP1 receptor 1                                          |
| Phvul.006G212500 | MAPK/ERK kinase kinase 1                                        | Phvul.005G014900 | Cystein-rich RLK (RECEPTOR-like protein kinase) 10       |
| Phvul.002G196200 | Leucine-rich receptor-like protein kinase family protein        | Phvul.006G200500 | Concanavalin A-like lectin protein kinase family protein |
| Phvul.008G029500 | Malectin/receptor-like protein kinase family protein            | Phvul.004G040000 | Malectin/receptor-like protein kinase family protein     |
| Phvul.003G158600 | S-locus lectin protein kinase family protein                    | Phvul.011G064400 | U-box domain-containing protein kinase family protein    |
| Phvul.004G155500 | PR5-like receptor kinase                                        | Phvul.004G155600 | Protein kinase superfamily protein                       |
| Phvul.007G048700 | Cystein-rich RLK (RECEPTOR-like protein kinase) 29              | Phvul.010G099400 | U-box domain-containing protein kinase family protein    |
| Phvul.003G062600 | Cystein-rich RLK (RECEPTOR-like protein kinase) 2               | Phvul.008G029900 | Malectin/receptor-like protein kinase family protein     |
| Phvul.001G076100 | Protein kinase superfamily protein                              | Phvul.002G220500 | S-locus lectin protein kinase family protein             |
| Phvul.003G154000 | Leucine-rich receptor-like protein kinase family protein        | Phvul.010G057000 | S-locus lectin protein kinase family protein             |
| Phvul.011G155800 | Diacylglycerol kinase 5                                         | Phvul.006G084400 | Cystein-rich RLK (RECEPTOR-like protein kinase) 3        |
| Phvul.008G047800 | Leucine-rich repeat receptor-like protein kinase family protein | Phvul.006G194600 | Receptor kinase 3                                        |
| Phvul.007G048600 | Cystein-rich RLK (RECEPTOR-like protein kinase) 29              | Phvul.001G048200 | Protein kinase superfamily protein                       |
| Phvul.005G054300 | Leucine-rich receptor-like protein kinase family protein        | Phvul.010G057500 | S-locus lectin protein kinase family protein             |
| Phvul.007G048800 | Cystein-rich RLK (RECEPTOR-like protein kinase) 29              | Phvul.006G190400 | HAL2-like                                                |
| Phvul.002G115900 | Protein kinase superfamily protein                              | Phvul.008G156400 | Cystein-rich RLK (RECEPTOR-like protein kinase) 42       |
| Phvul.007G030700 | Protein kinase superfamily protein                              | Phvul.002G318300 | Protein kinase superfamily protein                       |
| Phvul.006G057900 | Concanavalin A-like lectin protein kinase family protein        | Phvul.005G103200 | Concanavalin A-like lectin protein kinase family protein |
| Phvul.001G019100 | Mitogen-activated protein kinase kinase kinase 5                | Phvul.008G233400 | Protein kinase superfamily protein                       |
| Phvul.008G174300 | Protein kinase superfamily protein                              | Phvul.008G127000 | S-locus lectin protein kinase family protein             |
| Phvul.008G146000 | Leucine-rich repeat receptor-like protein kinase family protein | Phvul.011G169300 | Leucine-rich repeat transmembrane protein kinase         |
| Phvul.007G051400 | Cystein-rich RLK (RECEPTOR-like protein kinase) 23              | Phvul.009G239900 | Protein kinase superfamily protein                       |
| Phvul.008G175200 | Protein kinase superfamily protein                              | Phvul.011G194700 | Cystein-rich RLK (RECEPTOR-like protein kinase) 25       |
| Phvul.008G079800 | Leucine-rich repeat protein kinase family protein               | Phvul.007G210500 | Protein kinase superfamily protein                       |
| Phvul.010G088500 | S-locus lectin protein kinase family protein                    | Phvul.005G103400 | Protein kinase superfamily protein                       |
| Phvul.007G064200 | Protein kinase superfamily protein                              | Phvul.002G063700 | Cystein-rich RLK (RECEPTOR-like protein kinase) 2        |
| Phvul.007G048500 | cystein-rich RLK (RECEPTOR-like protein kinase) 29              | Phvul.002G215000 | Concanavalin A-like lectin protein kinase family protein |
| Phvul.005G055000 | Protein kinase superfamily protein                              | Phvul.001G135300 | Calcium-dependent protein kinase 32                      |
| Phvul.006G169700 | Integrin-linked protein kinase family                           | Phvul.004G173300 | Root hair specific 16                                    |
| Phvul.011G150400 | S-locus lectin protein kinase family protein                    | Phvul.009G239800 | Protein kinase family protein                            |
| Phvul.002G207000 | BRH1-associated receptor kinase                                 | Phvul.004G155300 | Receptor serine/threonine kinase, putative               |
| Phvul.006G066500 | Calmodulin-binding receptor-like cytoplasmic kinase 1           | Phvul.008G081000 | Malectin/receptor-like protein kinase family protein     |
| Phvul.007G048900 | Cystein-rich RLK (RECEPTOR-like protein kinase) 29              | Phvul.008G164500 | Leucine-rich repeat protein kinase family protein        |
| Phvul.002G018100 | Mitogen-activated protein kinase kinase kinase 21               | Phvul.004G164000 | Proline extensin-like receptor kinase 1                  |
| Phvul.010G118300 | CBL-interacting protein kinase 9                                | Phvul.004G154800 | Protein kinase superfamily protein                       |
| Phvul.002G063600 | Cystein-rich RLK (RECEPTOR-like protein kinase) 3               | Phvul.009G244600 | Leucine-rich repeat transmembrane protein kinase         |
| Phvul.002G023400 | Protein kinase superfamily protein                              | Phvul.007G049400 | Cystein-rich RLK (RECEPTOR-like protein kinase) 29       |
| Phvul.009G209200 | Leucine-rich repeat protein kinase family protein               | Phvul.007G049600 | Cystein-rich RLK (RECEPTOR-like protein kinase) 29       |
| Phvul.008G225000 | Leucine-rich repeat protein kinase family protein               | Phvul.008G077500 | Cystein-rich RLK (RECEPTOR-like protein kinase) 23/25    |
| Phvul.009G011400 | Protein kinase superfamily protein                              | Phvul.001G096600 | Protein kinase superfamily protein                       |
| Phvul.006G108300 | Leucine-rich repeat protein kinase family protein               | Phvul.002G063900 | Cystein-rich RLK (RECEPTOR-like protein kinase) 2        |
| Phvul.001G048400 | Receptor serine/threonine kinase, putative                      | Phvul.002G152100 | Leucine-rich repeat protein kinase family protein        |
| Phvul.002G000200 | Receptor-like protein kinase 1                                  | Phvul.002G201400 | Leucine-rich repeat protein kinase family protein        |
| Phvul.002G002600 | Protein kinase superfamily protein                              | Phvul.002G017700 | Protein kinase superfamily protein                       |
| Phvul.002G115800 | Protein kinase superfamily protein                              | Phvul.009G083300 | Protein kinase superfamily protein                       |
| Phvul.008G029700 | Malectin/receptor-like protein kinase family protein            | Phvul.002G108700 | Calcium-dependent protein kinase 16                      |
| Phvul.006G137300 | Wall-associated kinase family protein                           | Phvul.005G085600 | Protein kinase family protein                            |
| Phvul.003G226700 | Protein kinase superfamily protein                              | Phvul.006G150900 | Protein kinase superfamily protein                       |
| Phvul.007G051000 | Cystein-rich RLK (RECEPTOR-like protein kinase) 25              | Phvul.009G108500 | Casein kinase I-like 3                                   |
| Phvul.007G030900 | Protein kinase superfamily protein                              | Phvul.008G263900 | Calmodulin-binding receptor-like cytoplasmic kinase 1    |
| Phvul.007G057000 | With no lysine (K) kinase 1                                     | Phvul.011G119200 | Concanavalin A-like lectin protein kinase family protein |
| Phvul.008G030000 | Malectin/receptor-like protein kinase family protein            | Phvul.007G074000 | Protein kinase superfamily protein                       |

| Transcript ID    | Gene                                                                        | Transcript ID    | Gene                                                                        |
|------------------|-----------------------------------------------------------------------------|------------------|-----------------------------------------------------------------------------|
| Phvul.011G064000 | Protein kinase superfamily protein                                          | Phvul.001G049200 | PR5-like receptor kinase                                                    |
| Phvul.001G243700 | CRINKLY4 related 3                                                          | Phvul.005G164000 | Leucine-rich repeat protein kinase family protein                           |
| Phvul.001G265500 | Leucine-rich repeat protein kinase family protein                           | Phvul.003G252900 | Roline-rich extensin-like receptor kinase 4                                 |
| Phvul.005G138900 | Phototropin 1                                                               | Phvul.001G151100 | Cyclin p1;1                                                                 |
| Phvul.002G272100 | Mitogen-activated protein kinase kinase kinase 3                            | Phvul.007G233900 | Calcium dependent protein kinase 1                                          |
| Phvul.007G049000 | Cystein-rich RLK (RECEPTOR-like protein kinase) 29                          | Phvul.003G269700 | Protein kinase superfamily protein                                          |
| Phvul.005G162600 | Leucine-rich repeat protein kinase family protein                           | Phvul.001G255800 | Mitogen-activated protein kinase phosphatase 1                              |
| Phvul.001G051100 | S-domain-2 5                                                                | Phvul.010G018900 | S-locus lectin protein kinase family protein                                |
| Phvul.008G264400 | Leucine-rich repeat transmembrane protein kinase                            | Phvul.011G008100 | Leucine-rich repeat receptor-like protein kinase family protein             |
| Phvul.006G043700 | Calmodulin-domain protein kinase 9                                          | Phvul.010G070100 | Protein kinase superfamily protein                                          |
| Phvul.007G031000 | Protein kinase superfamily protein                                          | Phvul.007G110300 | CBL-interacting protein kinase 4                                            |
| Phvul.001G232300 | Protein kinase superfamily protein                                          | Phvul.001G076300 | Protein kinase superfamily protein                                          |
| Phvul.001G049000 | Protein kinase superfamily protein                                          | Phvul.002G247900 | Integrin-linked protein kinase family                                       |
| Phvul.002G328300 | MAP kinase 9                                                                | Phvul.001G137300 | Leucine-rich repeat receptor-like protein kinase family protein             |
| Phvul.011G167800 | Leucine-rich repeat transmembrane protein kinase                            | Phvul.008G026700 | Malectin/receptor-like protein kinase family protein                        |
| Phvul.005G167700 | cystein-rich RLK (RECEPTOR-like protein kinase) 10                          | Phvul.008G105600 | Leucine-rich repeat protein kinase family protein                           |
| Phvul.007G183000 | ROP binding protein kinases 2                                               | Phvul.003G293600 | Protein kinase superfamily protein                                          |
| Phvul.004G154500 | Protein kinase superfamily protein                                          | Phvul.008G084600 | SOS3-interacting protein 1                                                  |
| Phvul.002G055600 | Receptor-like protein kinase 1                                              | Phvul.011G007200 | Leucine-rich repeat protein kinase family protein                           |
| Phvul.001G129300 | 6-phosphogluconate dehydrogenase family protein                             | Phvul.008G081300 | Protein kinase superfamily protein                                          |
| Phvul.010G057400 | Receptor-like protein kinase 4                                              | Phvul.006G095700 | ROP binding protein kinases 2                                               |
| Phvul.005G078400 | Leucine-rich repeat transmembrane protein kinase                            | Phvul.008G154200 | Leucine-rich repeat protein kinase family protein                           |
| Phvul.002G215100 | Leucine-rich repeat protein kinase family protein                           | Phvul.002G111100 | Leucine-rich receptor-like protein kinase family protein                    |
| Phvul.006G187700 | Protein kinase superfamily protein                                          | Phvul.001G134600 | Leucine-rich repeat protein kinase family protein                           |
| Phvul.009G133000 | Protein kinase protein with adenine nucleotide alpha hydrolases-like domain | Phvul.001G083300 | Receptor-like protein kinase 2                                              |
| Phvul.001G048600 | Protein kinase superfamily protein                                          | Phvul.006G029000 | Leucine-rich receptor-like protein kinase family protein                    |
| Phvul.008G029600 | Malectin/receptor-like protein kinase family protein                        | Phvul.002G223600 | HAL2-like                                                                   |
| Phvul.002G242600 | Receptor-like kinase in flowers 1                                           | Phvul.007G153400 | Leucine-rich repeat transmembrane protein kinase family protein             |
| Phvul.003G120800 | Protein kinase superfamily protein                                          | Phvul.007G112100 | Leucine-rich repeat protein kinase family protein                           |
| Phvul.002G292400 | MAP kinase 4                                                                | Phvul.009G082500 | Leucine-rich receptor-like protein kinase family protein                    |
| Phvul.005G135500 | Protein kinase superfamily protein                                          | Phvul.003G203100 | Leucine-rich receptor-like protein kinase family protein                    |
| Phvul.008G155300 | Like SEX4 1                                                                 | Phvul.005G185800 | Leucine-rich repeat protein kinase family protein                           |
| Phvul.001G090800 | Protein kinase superfamily protein                                          | Phvul.011G081800 | Protein kinase family/ peptidoglycan-binding LysM domain-containing protein |
| Phvul.005G088700 | S-locus lectin protein kinase family protein                                | Phvul.002G215200 | Concanavalin A-like lectin protein kinase family protein                    |
| Phvul.006G084800 | Cystein-rich RLK (RECEPTOR-like protein kinase) 2                           | Phvul.004G147900 | MAP kinase kinase 9                                                         |
| Phvul.001G130800 | Wall associated kinase 5                                                    | Phvul.006G217700 | Protein kinase superfamily protein                                          |
| Phvul.005G106800 | STRUBBELIG-receptor family 3                                                | Phvul.009G114400 | Leucine-rich repeat transmembrane protein kinase family protein             |
| Phvul.008G127100 | S-locus lectin protein kinase family protein                                | Phvul.008G258400 | Protein kinase superfamily protein                                          |
| Phvul.007G050700 | Cystein-rich RLK (RECEPTOR-like protein kinase) 25                          | Phvul.002G184800 | BRI1-like 2                                                                 |
| Phvul.001G048700 | Protein kinase superfamily protein                                          | Phvul.008G188700 | Concanavalin A-like lectin protein kinase family protein                    |
| Phvul.011G119100 | Protein kinase superfamily protein                                          | Phvul.007G279600 | CBL-interacting protein kinase 7                                            |
| Phvul.010G165000 | Protein kinase protein with adenine nucleotide alpha hydrolases-like domain | Phvul.005G077600 | Leucine-rich repeat transmembrane protein kinase                            |
| Phvul.002G049500 | Cystein-rich RLK (RECEPTOR-like protein kinase) 25                          | Phvul.008G086400 | Leucine-rich receptor-like protein kinase family protein                    |
| Phvul.008G106600 | Leucine-rich repeat receptor-like protein kinase family protein             | Phvul.011G054300 | Crinkly4                                                                    |
| Phvul.010G057600 | Receptor-like protein kinase 1                                              | Phvul.007G103900 | Protein kinase superfamily protein                                          |
| Phvul.011G142200 | Protein kinase superfamily protein                                          | Phvul.011G181900 | Protein kinase superfamily protein                                          |
| Phvul.005G079100 | Leucine-rich repeat transmembrane protein kinase                            | Phvul.010G086600 | Protein kinase superfamily protein                                          |
| Phvul.011G198200 | Receptor serine/threonine kinase, putative                                  | Phvul.005G148800 | AGC (cAMP/cGMP-dependent and protein kinase C) kinase family protein        |
| Phvul.002G227300 | Protein kinase superfamily protein                                          | Phvul.009G087500 | CBL-interacting protein kinase 25                                           |
| Phvul.005G051000 | Lectin protein kinase family protein                                        | Phvul.011G035600 | Protein kinase protein with adenine nucleotide alpha hydrolases-like domain |
| Phvul.003G187200 | Leucine-rich repeat protein kinase family protein                           | Phvul.010G044800 | Cyclin p4;1                                                                 |
| Phvul.010G033800 | Leucine-rich repeat transmembrane protein kinase family protein             | Phvul.006G149700 | ATPase, F1 complex, gamma subunit protein                                   |
| Phvul.011G194400 | Receptor kinase 1                                                           | Phvul.008G124900 | S-locus lectin protein kinase family protein                                |
| Phvul.011G193900 | Receptor kinase 2                                                           | Phvul.011G194200 | Cystein-rich RLK (RECEPTOR-like protein kinase) 25                          |
| Phvul.003G139200 | Protein kinase superfamily protein                                          | Phvul.008G281500 | Leucine-rich receptor-like protein kinase family protein                    |

**B**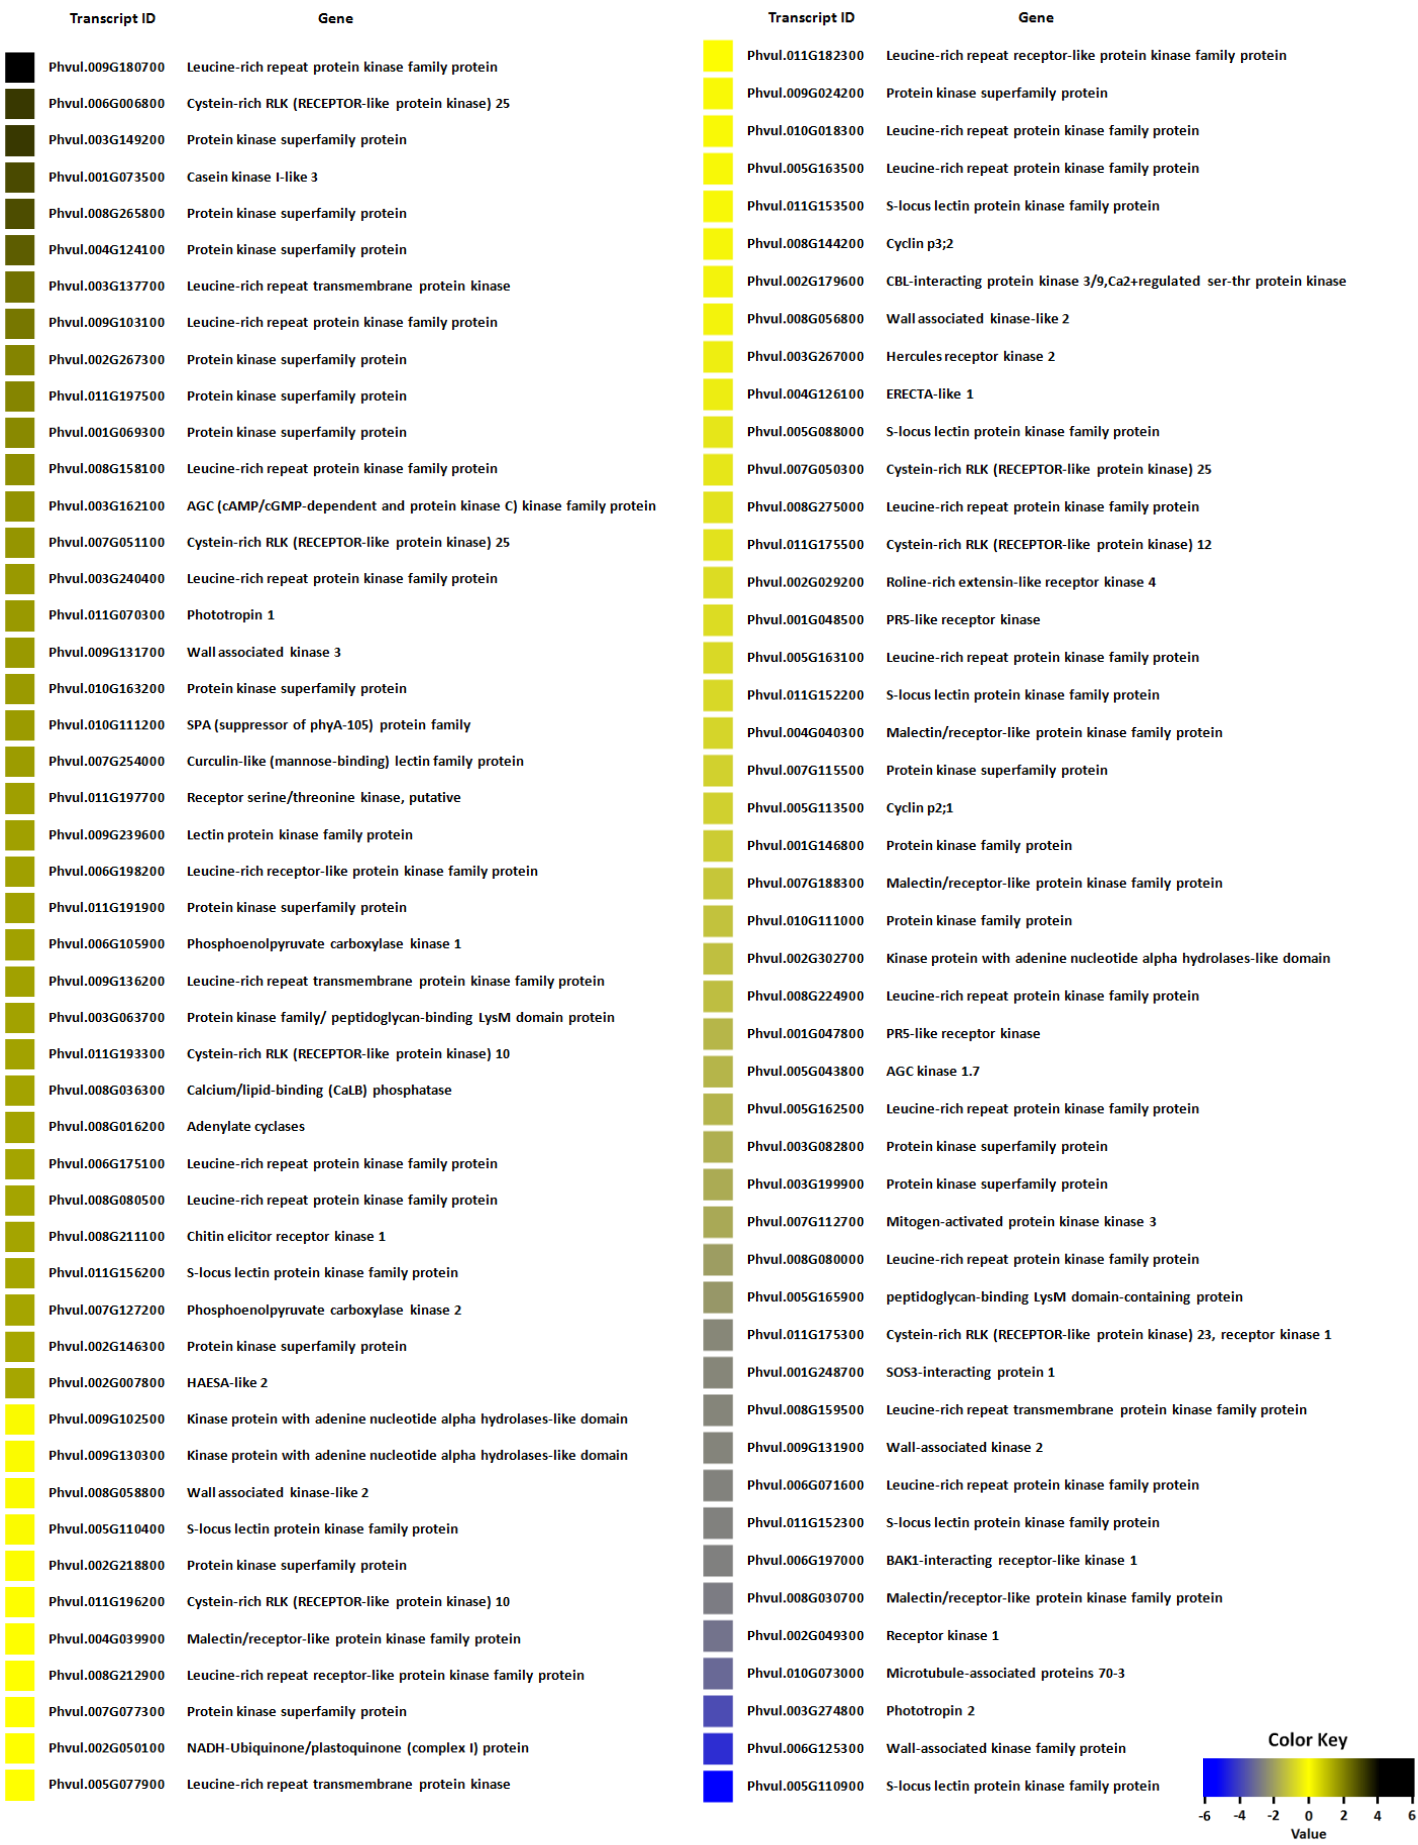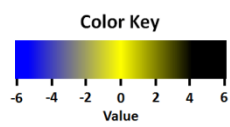

**S10 Fig. DEGs of P metabolism genes during root symbioses.** Expression profile of unique P metabolism genes in *P. vulgaris* roots colonized by (A) AMF and (B) rhizobia. Expression profile showing upregulated and downregulated DEGs obtained from GO analysis. Statistically significant DEGs were identified using an unpaired *t*-test ( $p < 0.05$ ), in symbiont treatment over controls (S3 Table). Fold-change values (over control) were used to plot heat maps. Color bar scale shows the fold-change range with red and green representing downregulation and upregulation, respectively.
