# Supplementary material for: Differentially expressed genes in mycorrhized and nodulated roots of common bean are associated with defense, cell wall architecture, N metabolism, and P metabolism
Source: PubMed Central journal article supplement (PMC5542541; doi:10.1371/journal.pone.0182328), 2017-08-03
Supplement: pone.0182328.s011.pdf [file pone.0182328.s011.pdf]

# S11 Fig

**A**

**INOSITOL PHOSPHATE METABOLISM**

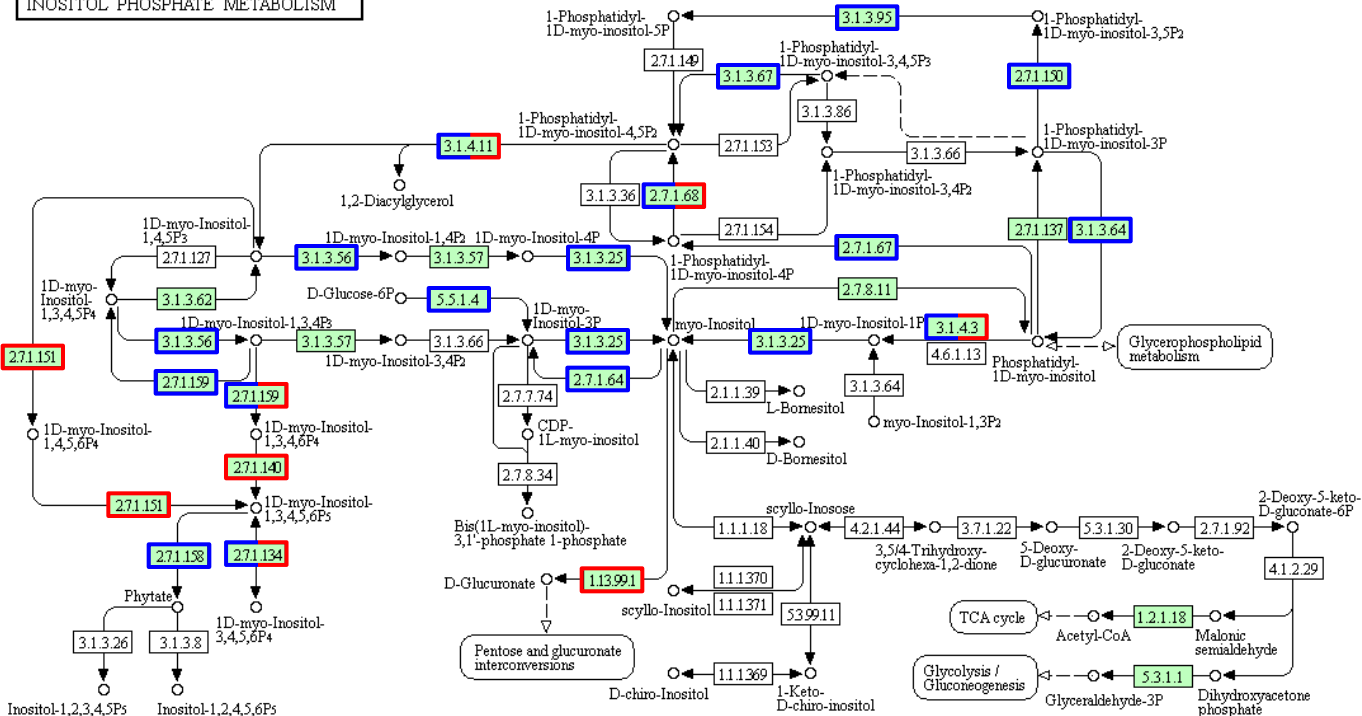

00562 3/5/15  
(c) Kanehisa Laboratories

**B**

**INOSITOL PHOSPHATE METABOLISM**

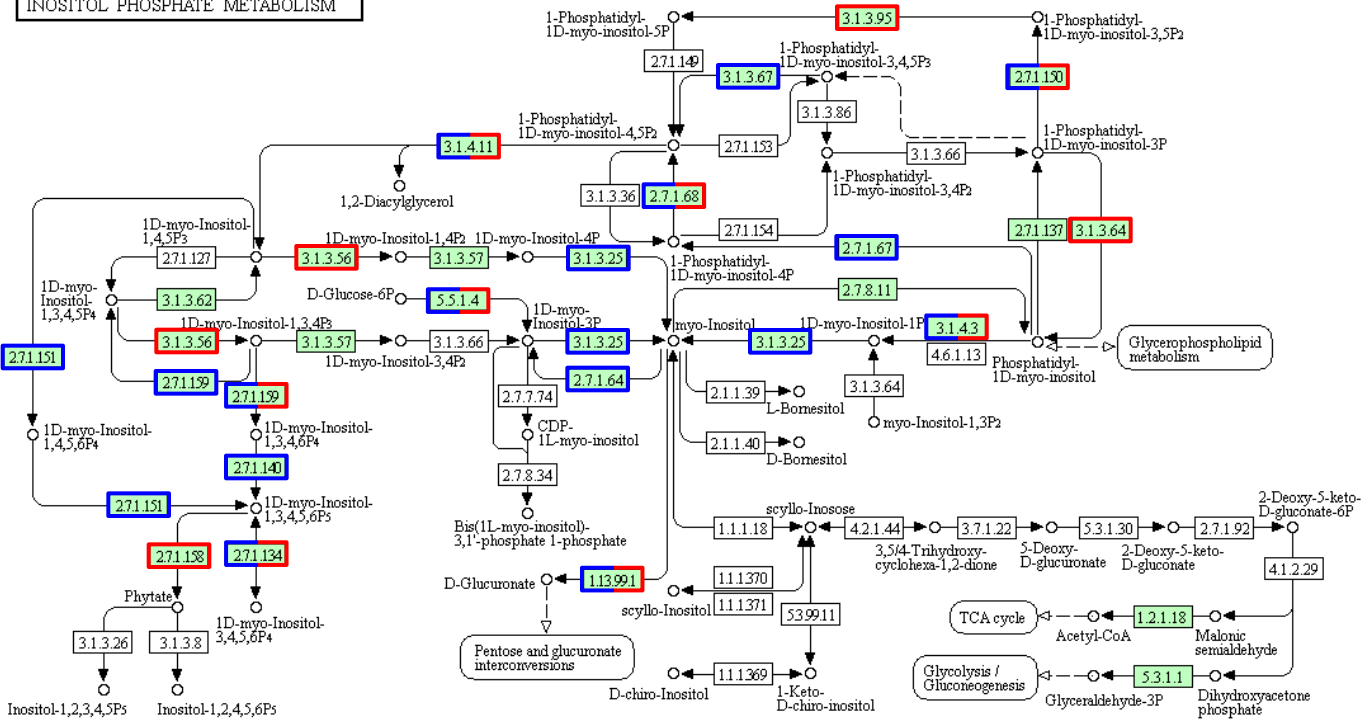

00562 3/5/15  
(c) Kanehisa Laboratories

**S11 Fig. Effect of root symbiosis on the inositol phosphate metabolism pathway in mycorrhized and nodulated *P. vulgaris* roots.** The pathway model was obtained from KEGG Pathway [52]. Differential expression patterns of key genes and enzymes of inositol phosphate metabolism in *P. vulgaris* roots colonized by (A) AMF and (B) rhizobia. Blue and red borders surrounding EC identifiers represent genes that were upregulated and downregulated, respectively, relative to the controls. Borders with mixed colors indicate both upregulation and downregulation of different transcripts of the same gene.
